# Supplementary material for: Fluorescent probe based on N-doped carbon dots for the detection of intracellular pH and glutathione
Source: Royal Society of Chemistry journal article supplement (doi:10.1039/d0ra06636b), 2020-01-01
Supplement: d0ra06636b1.pdf [file d0ra06636b1.pdf]

## **Electronic Supplementary Information**

### **A fluorescent probe based on N-doped carbon dots for detection of intracellular pH and glutathione**

Meihua Lin, Xin Ma, Shijun Lin, Xiaojin Zhang, Yu Dai\* and Fan Xia

Engineering Research Center of Nano-Geomaterials of Ministry of Education, Faculty  
of Materials Science and Chemistry, China University of Geosciences, Wuhan  
430074, China

\*Corresponding author. Tel: 86-27-6788 5201. E-mail: yudai@cug.edu.cn (Yu Dai)

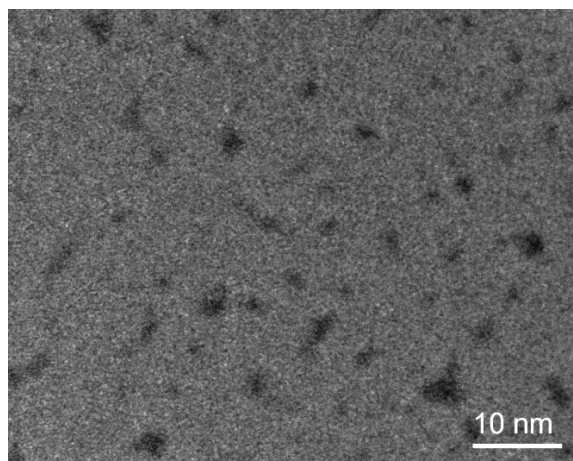

**Fig. S1** TEM image of N-CDs.

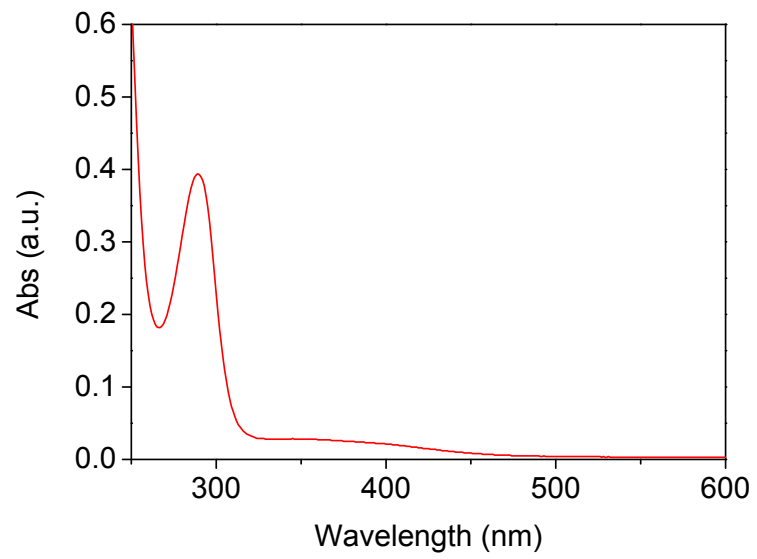

**Fig. S2** UV-Vis absorption spectrum of N-CDs.

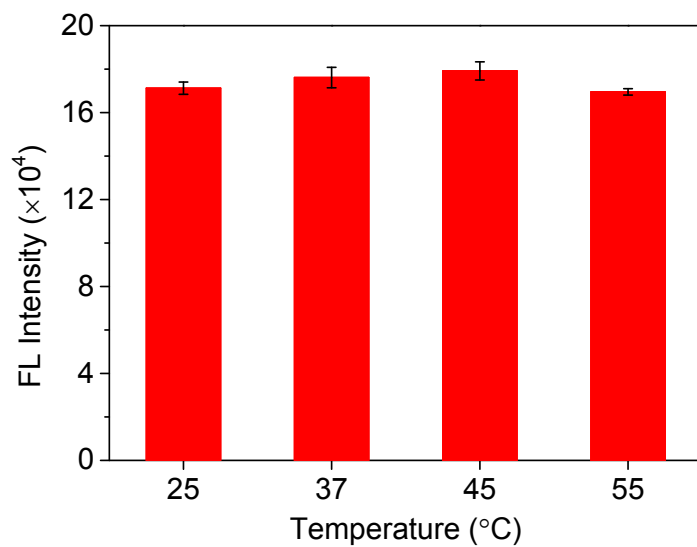

**Fig. S3** Fluorescence intensity of N-CDs at 510 nm at different temperatures. The excitation wavelength is 360 nm. All experiments were repeated 3 times.

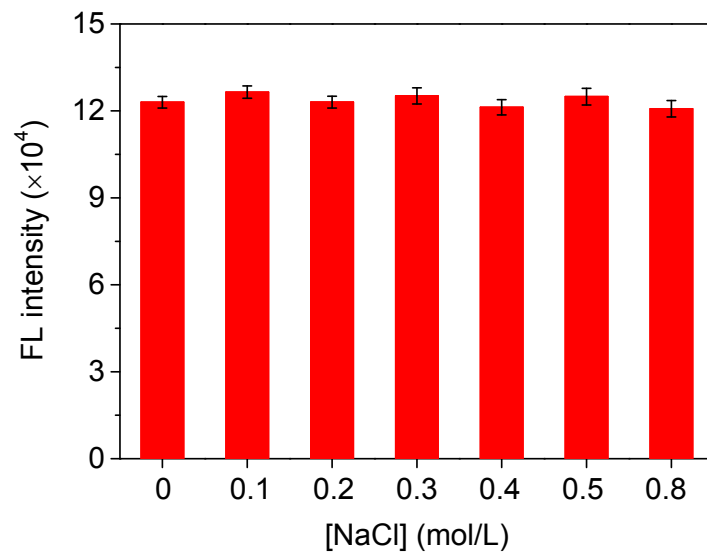

**Fig. S4** Fluorescence intensity of N-CDs at 510 nm at different NaCl concentrations. The excitation wavelength is 360 nm. All experiments were repeated 3 times.

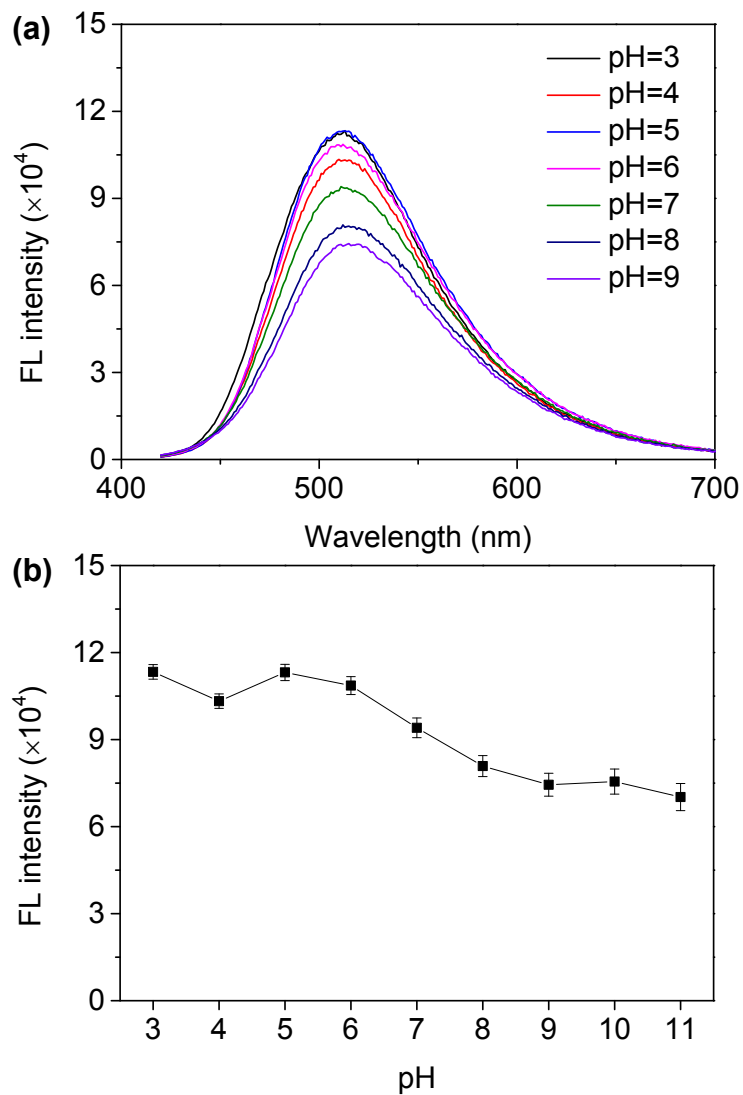

**Fig. S5** (a) Fluorescence spectra of N-CDs in disodium citrate-citrate buffer solution and (b) relationship between fluorescence intensity at 510 nm and pH. All experiments were repeated 3 times.

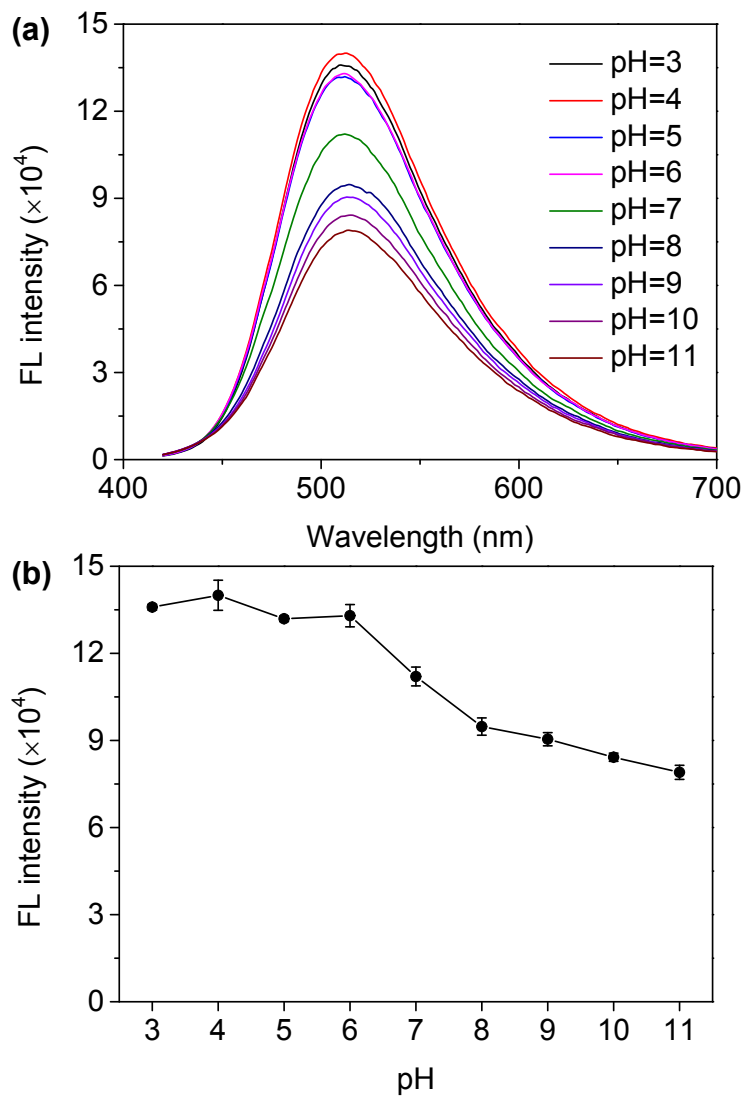

**Fig. S6** (a) Fluorescence spectra of N-CDs in Tris-HCl buffer solution and (b) relationship between fluorescence intensity at 510 nm and pH. All experiments were repeated 3 times.

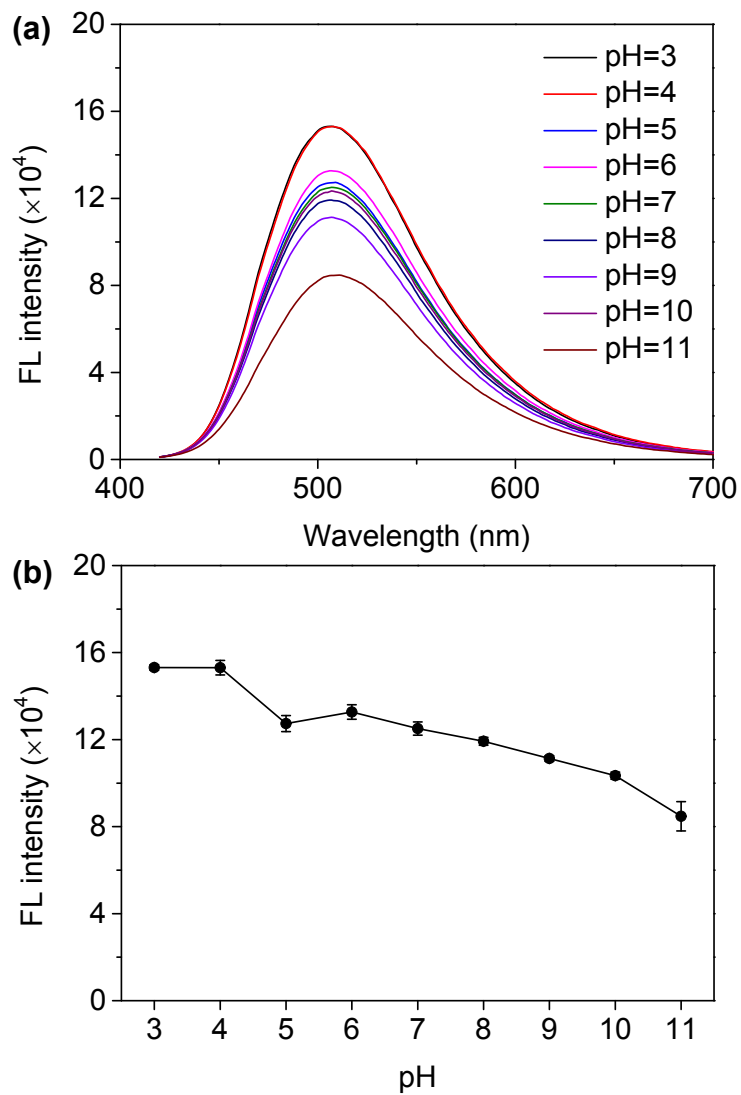

**Fig. S7** (a) Fluorescence spectra of N-CDs in HCl/NaOH solution, (b) relationship between fluorescence intensity at 510 nm and pH. All experiments were repeated 3 times.



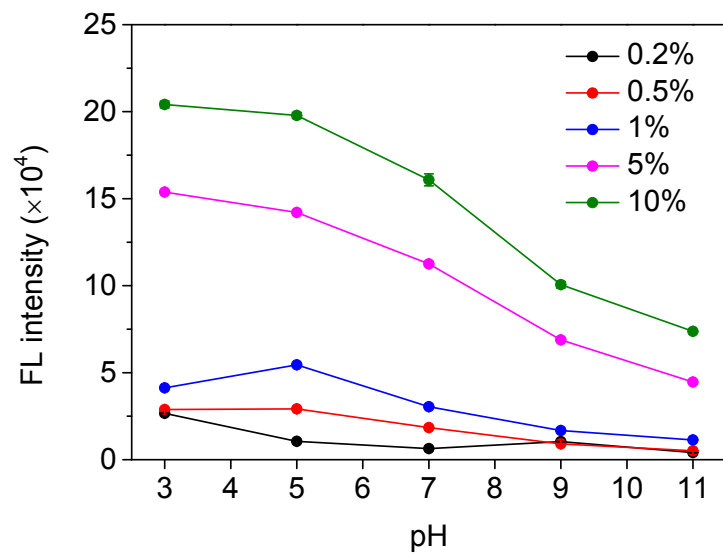

**Fig. S8** Relationship between fluorescence intensity of N-CDs at 510 nm and pH at different N-CDs concentrations. All experiments were repeated 3 times.

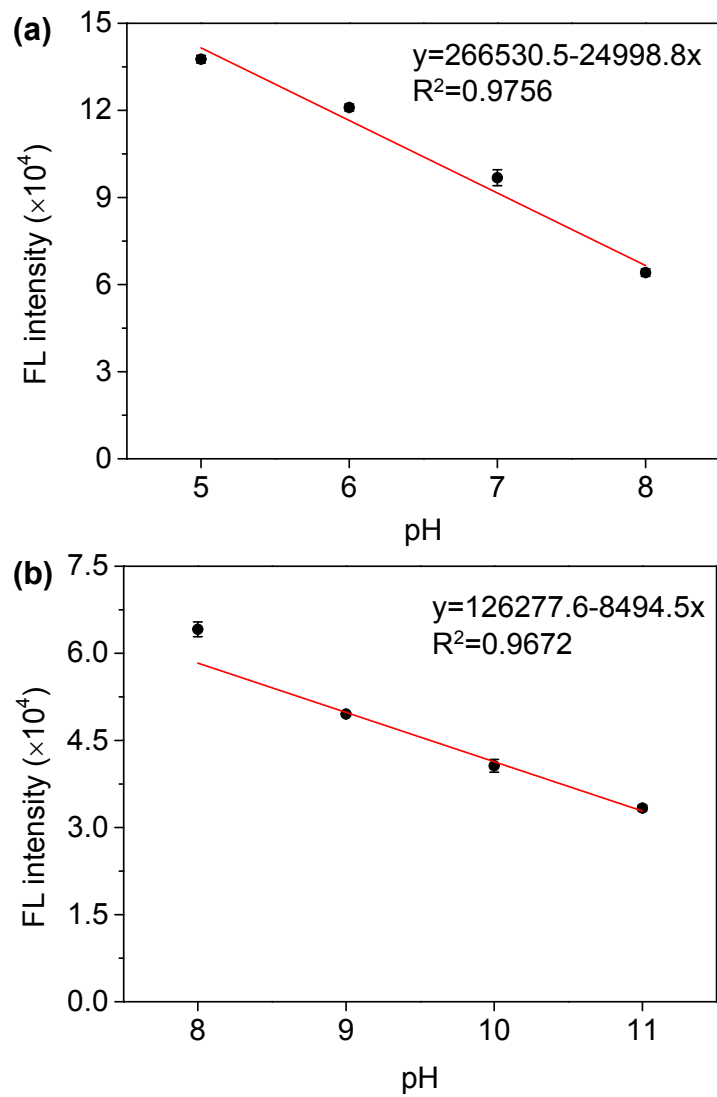

**Fig. S9** Linear relationship of fluorescence intensity of N-CDs at 510 nm versus pH in the range of (a) 5-8 and (b) 8-11. All experiments were repeated 3 times.

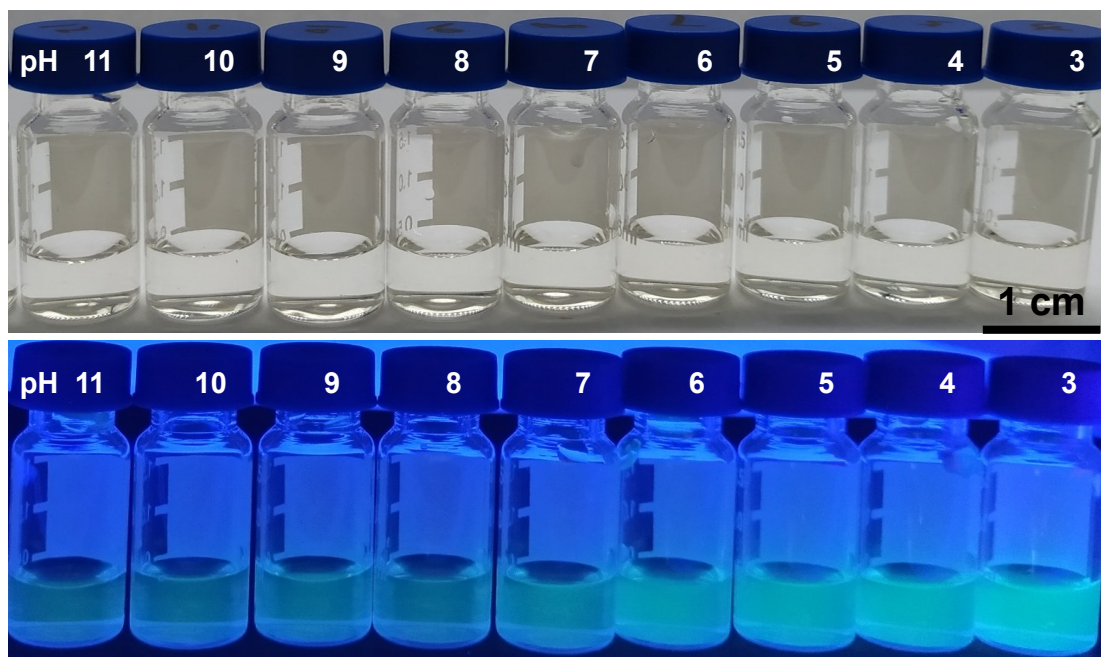

**Fig. S10** Photographs of N-CDs under daylight and UV lamp (365 nm) irradiation.

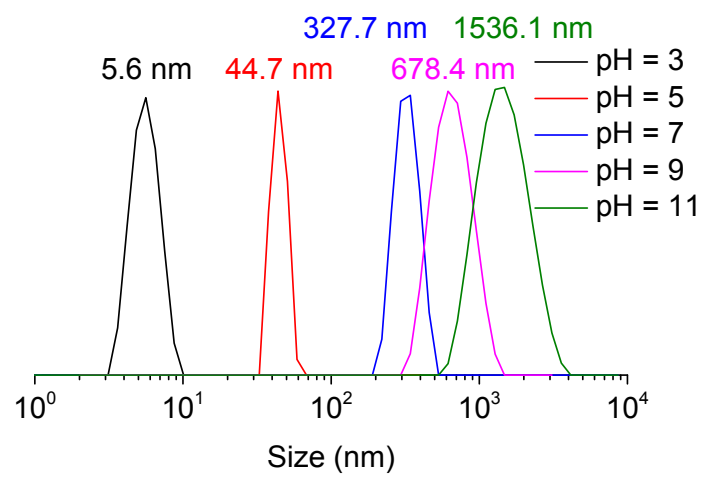

**Fig. S11** DLS patterns of N-CDs at different pH.

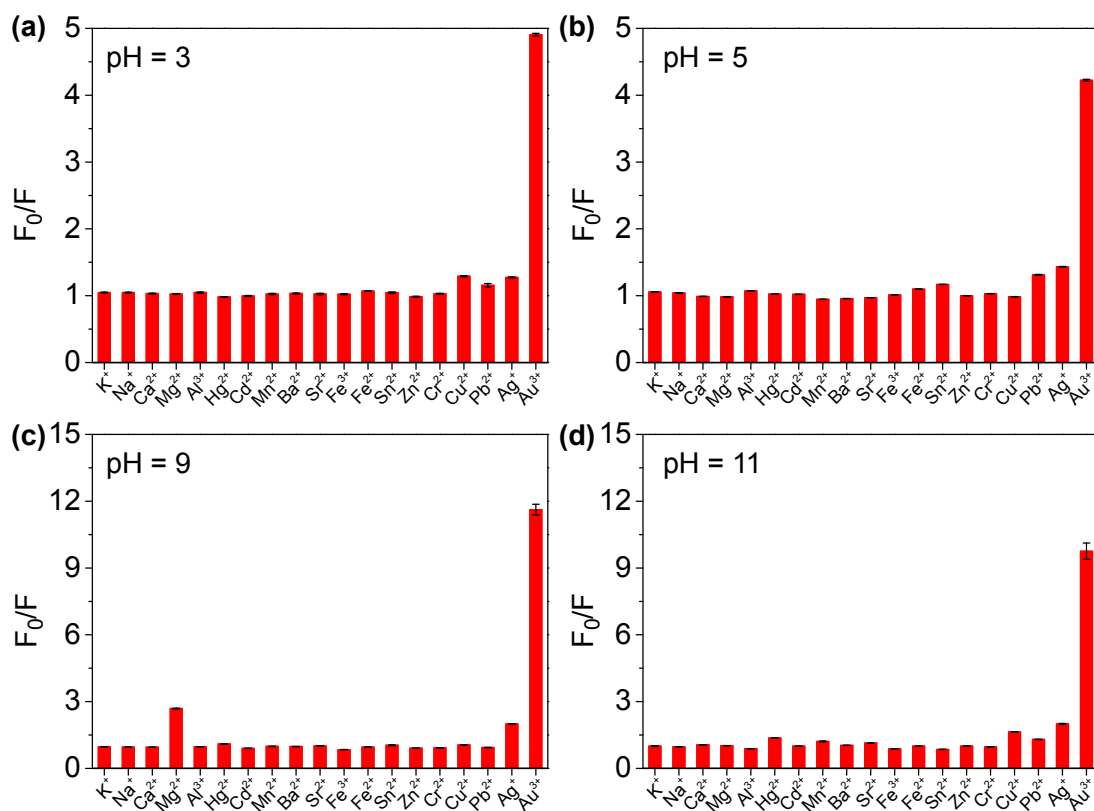

**Fig. S12** Selectivity of the probe for different analytes.  $F_0$  and  $F$  represent fluorescence intensity of N-CDs and N-CDs+analyte at 510 nm, respectively. The analyte concentration is 1 mM. Ex = 400 nm. (a) pH = 3, (b) pH = 5, (c) pH = 9, and (d) pH = 11. All experiments were repeated 3 times.

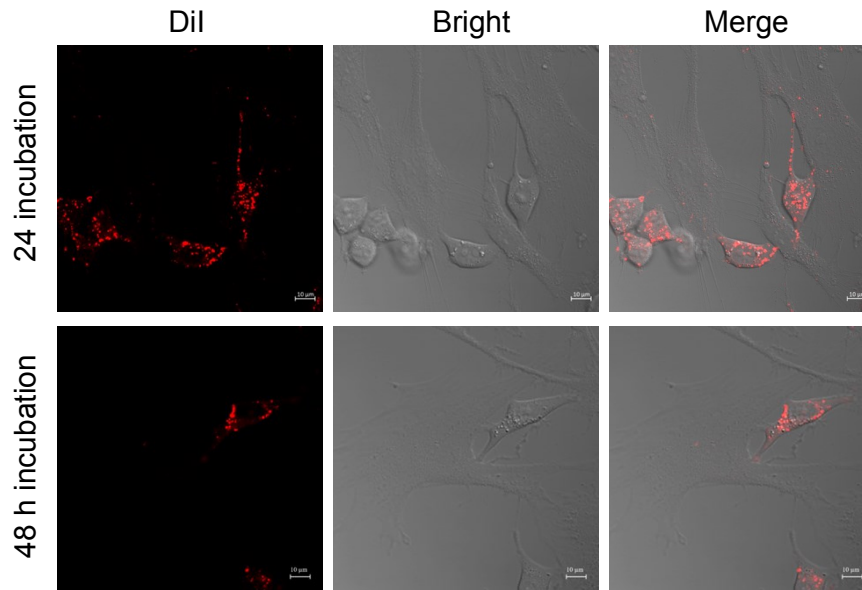

**Fig. S13** Confocal image of co-culturing DiI-labeled HeLa and HESC cells, Ex = 544 nm, Em = 555-575 nm. DiI was incubated with HeLa cells for 24 h and 48 h. Scale bar: 10 μm.

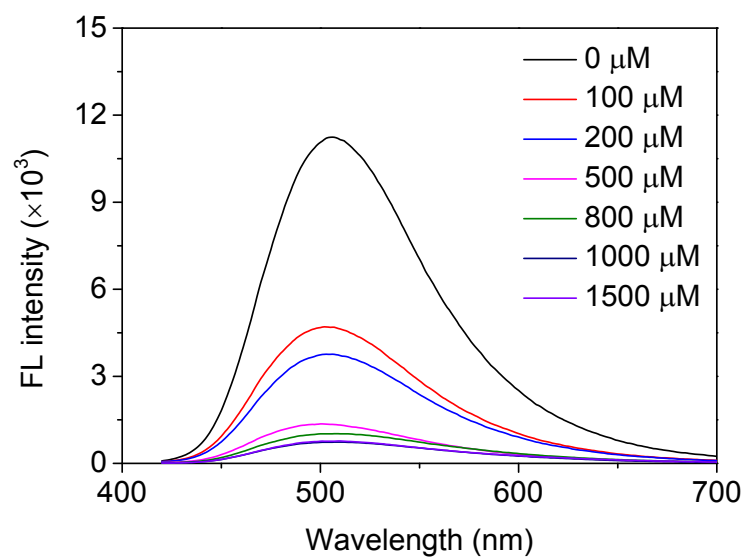

**Fig. S14** Fluorescence spectra of N-CDs after adding Au<sup>3+</sup>. Au<sup>3+</sup> concentration is 0-1500 μM.

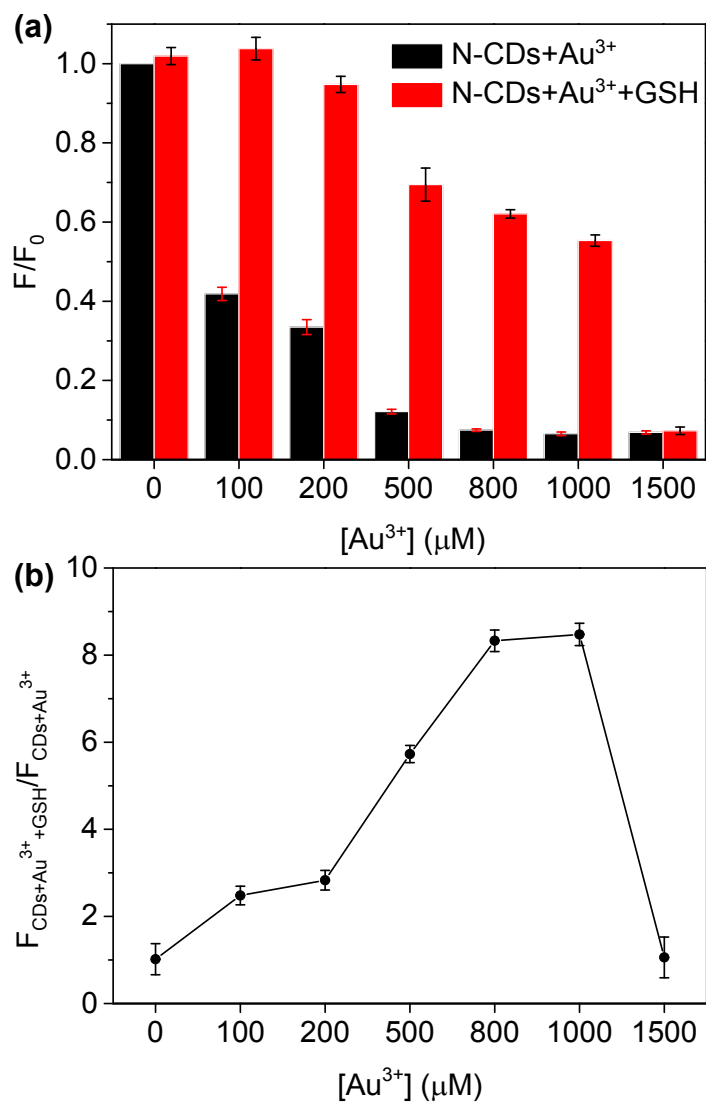

**Fig. S15** (a) Fluorescence intensity of N-CDs+ $\text{Au}^{3+}$  and N-CDs+ $\text{Au}^{3+}$ +GSH.  $F_0$  represents fluorescence intensity of N-CDs at 510 nm. (b) Ratio of fluorescence intensity of N-CDs+ $\text{Au}^{3+}$ +GSH and N-CDs+ $\text{Au}^{3+}$ . All experiments were repeated 3 times.



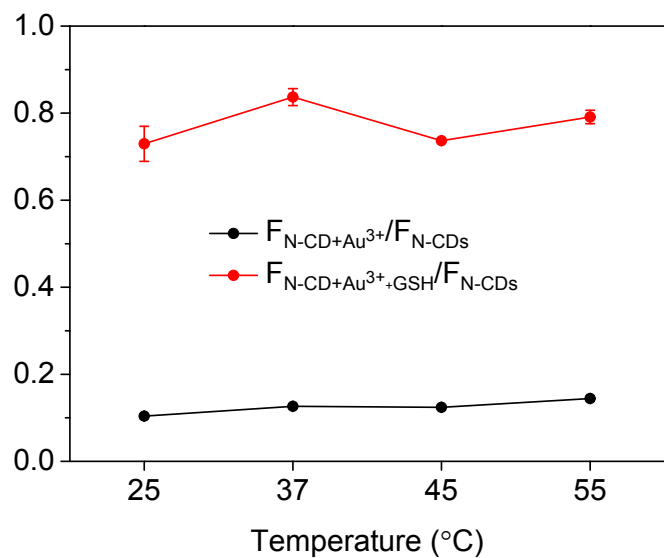

**Fig. S16** Ratio of fluorescence intensity of N-CDs+Au<sup>3+</sup> or N-CDs+Au<sup>3+</sup>+GSH to fluorescence intensity of N-CDs at 510 nm at different temperatures. All experiments were repeated 3 times.

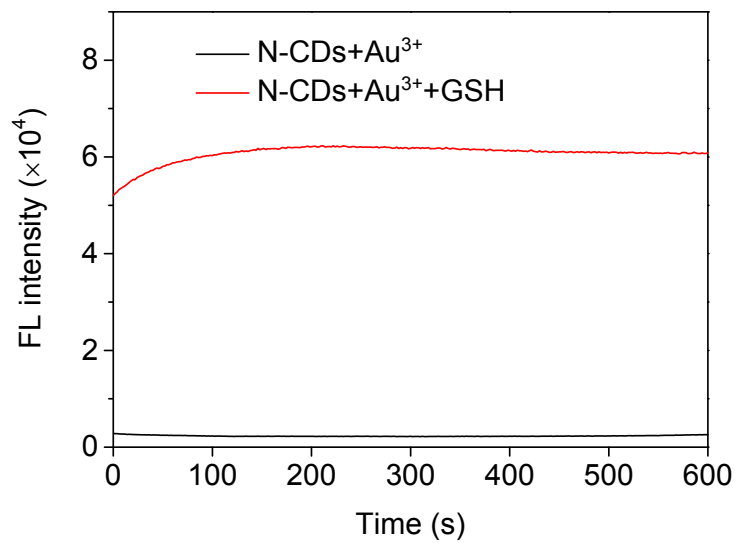

**Fig. S17** Relationship between fluorescence intensity of N-CDs+Au<sup>3+</sup> or N-CDs+Au<sup>3+</sup>+GSH at 510 nm and incubation time.

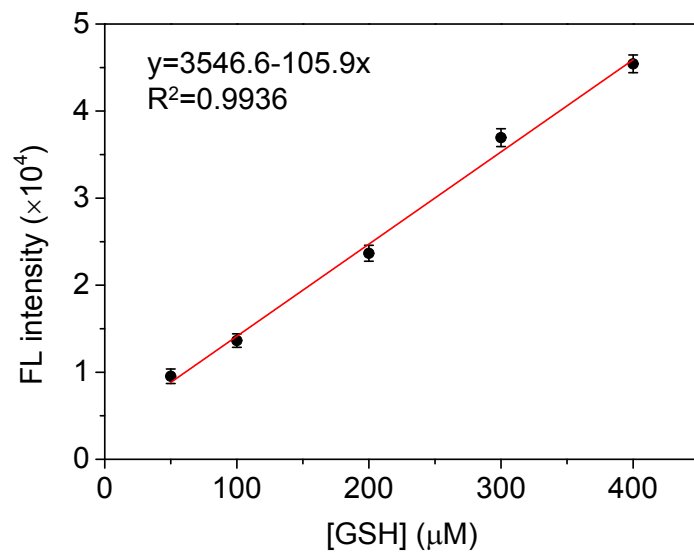

**Fig. S18** Linear relationship of fluorescence intensity of N-CDs+Au<sup>3+</sup> at 510 nm versus GSH concentration in the range of 50-400 μM. All experiments were repeated 3 times.
